# Supplementary material for: Helminth species dependent effects on Th1 and Th17 cytokines in active tuberculosis patients and healthy community controls
Source: PLOS journal article supplement (doi:10.1371/journal.pntd.0010721), 2022-08-17
Supplement: S1 (10.1371/journal.pntd.0010721.s001) [file journal.pntd.0010721.s001]

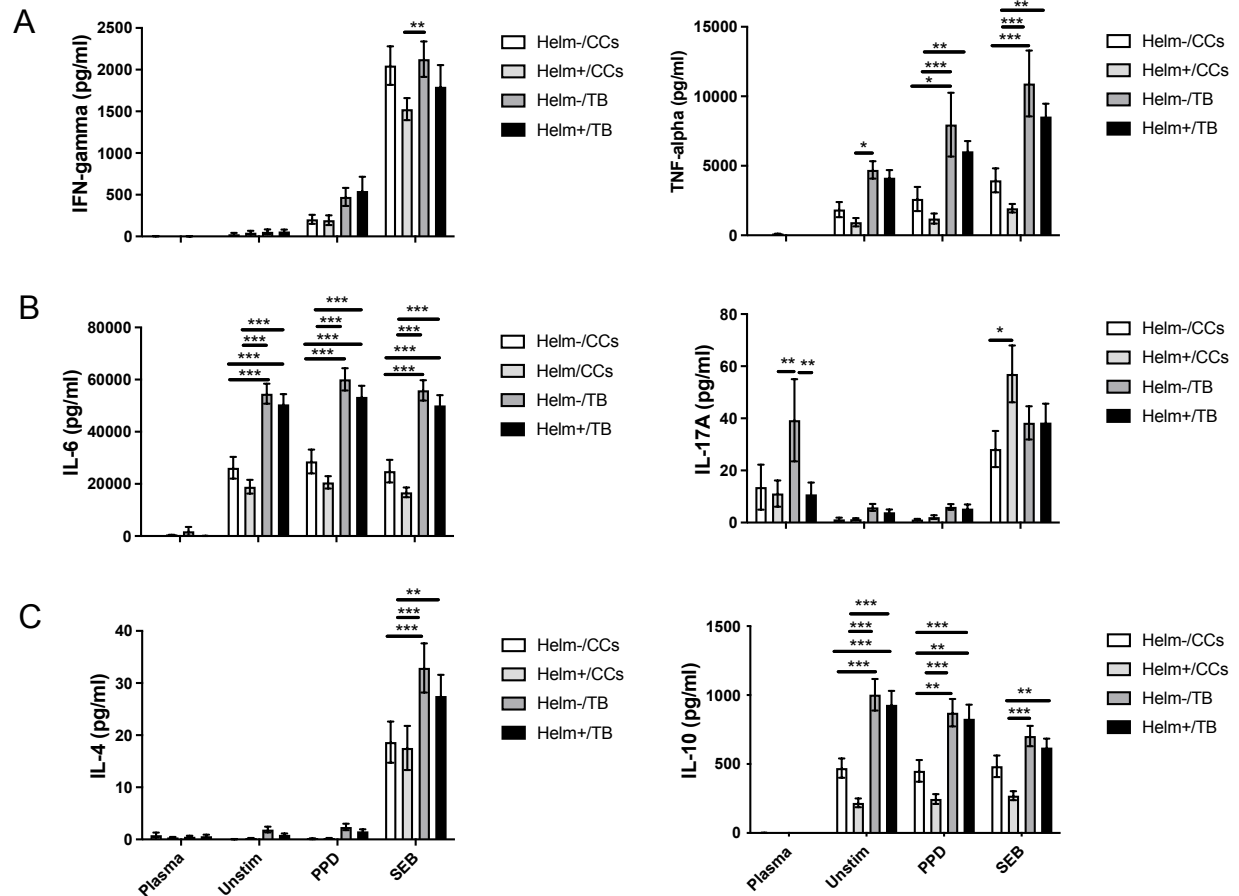

**Supporting information S1 Fig. Proinflammatory cytokines and IL-10 are increased in TB patients regardless of helminth infection compared with CCs.**

PBMCs isolated from TB patients with or without helminths were stimulated with media alone (Unstim), PPD or SEB and cultured for 19h at 37°C, and PBMC supernatants harvested. The level of IFN-gamma, TNF-alpha, IL-6, IL-17A, IL-10 and IL-4 were determined in plasma and from PBMC supernatants using cytometric bead array. Concentration of IFN-gamma (left) and TNF-alpha (right) (A), IL-6 (left) and IL-17A (right) (B), IL-4 (left) and IL-10 (right). Overall, there were increased levels of pro-inflammatory cytokines in TB patients compared to CCs. Regarding IL-17A, only the Helm-/TB groups show increased levels in plasma whereas Helm+/TB patients were suppressed to the same level as the CC groups ( $p < 0.01$ ). Data are presented as mean  $\pm$  SEM.

n=24 for Helm-/CCs and n=46 for Helm+CCs, and n=52 for both Helm- and Helm+ TB groups.

Two-way ANOVA with Tukey's multiple comparison test was used for comparing TB groups (both for helminth positive and negative groups) versus CCs (both for helminth negative and positive groups). \*,  $p < 0.05$ ; \*\*,  $p < 0.01$ , \*\*\*,  $p < 0.001$ .
